# Supplementary material for: A Targeted Metagenomics Approach to Study the Diversity of Norovirus GII in Shellfish Implicated in Outbreaks
Source: PubMed Central journal article supplement (PMC7552006; doi:10.3390/v12090978), 2020-09-03
Supplement: viruses-12-00978-s001.pdf [file viruses-12-00978-s001.pdf]

Table S1. Genotype or P-type and accession number of NoV references used for mapping.

| Gene    | Classification | Accession number |
|---------|----------------|------------------|
| RdRp    | GII.P1         | U07611           |
|         | GII.P2         | X81879           |
|         | GII.P3         | U22498           |
|         | GII.P4_1995    | AB089860         |
|         | GII.P4_2002    | AY502023         |
|         | GII.P4_2002CN  | EU31092          |
|         | GII.P4_2003    | AB294779         |
|         | GII.P4_2004    | EF126961         |
|         | GII.P4_2006a   | EF126963         |
|         | GII.P4_2006b   | EF126966         |
|         | GII.P4_2007EU  | AB49129          |
|         | GII.P4_2007JP  | GQ84536          |
|         | GII.P4_2009    | JN595867         |
|         | GII.P4_Brist   | X76716           |
|         | GII.P4_Camb    | AF145896         |
|         | GII.P5         | AF397156         |
|         | GII.P6         | AB039778         |
|         | GII.P7         | AB258331         |
|         | GII.P8         | AB039780         |
|         | GII.P11        | AB126320         |
|         | GII.P12        | AB220922         |
|         | GII.P12        | AF504671         |
|         | GII.P13        | EU921354         |
|         | GII.P15        | GQ856474         |
|         | GII.P16        | AY682551         |
|         | GII.P17        | LC037415         |
|         | GII.P18        | AY823304         |
|         | GII.P20        | EU424333         |
|         | GII.P21        | AY682549         |
|         | GII.P22        | AB083780         |
|         | GII.P23        | MG495080         |
|         | GII.P24        | KY225989         |
|         | GII.P25        | MG495083         |
|         | GII.P26        | KU306738         |
| GII.P27 | MG495077       |                  |
| GII.P28 | KJ196291       |                  |
| GII.P29 | AB190457       |                  |
| GII.P30 | AY134748       |                  |
| GII.P31 | JX459907       |                  |
| GII.P32 | AY682550       |                  |
| GII.P33 | GQ845370       |                  |
| GII.P34 | AB089882       |                  |

|        |                 |            |
|--------|-----------------|------------|
|        | GII.P35         | AY682552   |
|        | GII.P36         | AF315813   |
|        | GII.P37         | EU921353   |
|        | GII.P38         | GQ856469   |
|        | GII.P39         | FJ537134   |
|        | GII.P40         | AB212306   |
|        | GII.P41         | DQ379714   |
|        | GII.PNA1        | MG495079   |
|        | GII.PNA2        | MG706448   |
|        | GII.PNA3        | FJ537135   |
|        | GII.PNA4        | AB074893   |
|        | GII.PNA5        | MG495082   |
|        | GII.PNA7        | LC342059   |
|        | GII.PNA8        | KR904229   |
|        | GII.PNA9        | MK733205   |
| VP1    | GII.1           | U07611     |
|        | GII.2           | X81879     |
|        | GII.3           | U22498     |
|        | GII.4_1995      | AF080558   |
|        | GII.4_2002      | AY502023   |
|        | GII.4_2002CN    | EU310927   |
|        | GII.4_2003      | AB303929   |
|        | GII.4_2004      | DQ078814   |
|        | GII.4_2005      | DQ369797   |
|        | GII.4_2006a     | EF126963   |
|        | GII.4_2006b     | EF684915   |
|        | GII.4_2007Ca    | GQ845368   |
|        | GII.4_2007EU    | HQ009513   |
|        | GII.4_2007JP    | AB434770   |
|        | GII.4_2009      | JN400623   |
|        | GII.4_2012      | JX459908   |
|        | GII.4_2016      | LC175468   |
|        | GII.4_2019      | CUHK_NS_22 |
|        | GII.4_Bristol   | X76716     |
|        | GII.4_Cambridge | AF145896   |
|        | GII.5           | AF397156   |
|        | GII.6           | AB039778   |
|        | GII.7           | AF414409   |
|        | GII.8           | AB039780   |
|        | GII.9           | AY038599   |
|        | GII.10          | AY237415   |
|        | GII.11          | AB126320   |
|        | GII.12          | EU921353   |
| GII.13 | EU921354        |            |
| GII.14 | GQ856465        |            |

|  |         |          |
|--|---------|----------|
|  | GII.16  | AY772730 |
|  | GII.17  | LC037415 |
|  | GII.18  | AY823304 |
|  | GII.19  | AY823306 |
|  | GII.20  | EU424333 |
|  | GII.21  | GQ856468 |
|  | GII.22  | AB083780 |
|  | GII.24  | KY225989 |
|  | GII.25  | GQ856474 |
|  | GII.26  | KU306738 |
|  | GII.NA1 | MG495079 |
|  | GII.NA2 | MG706448 |
|  | GIII.1  | EU360814 |
|  | GIV     | EU224456 |
|  | GIX.1   | GQ856474 |
|  | GVIII.1 | KJ196291 |
